# Supplementary material for: Construction of lacunary α-K8SiW11O39 polyoxometalate/MIL-101(Cr) MOF/CoFe2O4 magnetic nanocomposites for adsorptive removal of toxic azo dyes and antibiotics from wastewater
Source: Royal Society of Chemistry journal article supplement (doi:10.1039/d5ce00013k), 2025-01-01
Supplement: d5ce00013k1.pdf [file d5ce00013k1.pdf]

## Supplementary Information (SI)

### **Construction of Lacunary $\alpha$ - $\text{K}_8\text{SiW}_{11}\text{O}_{39}$ polyoxometalate/MIL-101(Cr)MOF/ $\text{CoFe}_2\text{O}_4$ magnetic nanocomposites for adsorptive removal of toxic azo dyes and antibiotics from wastewater**

Hamidreza Nourolohi,<sup>a,b</sup> Saeed Farhadi,<sup>a\*</sup> Reihaneh Malakooti,<sup>b</sup> Mansoureh Maleki<sup>c</sup>, and Farzaneh Mahmoudi<sup>d</sup>

<sup>a</sup>Department of Inorganic Chemistry, Faculty of Chemistry, Lorestan University, Khorramabad, Iran

<sup>b</sup>Department Chemistry, Faculty of Science, University of Birjand, Birjand, Iran

<sup>c</sup>Department of Chemistry, Payame Noor University, P. O. Box 19395-4697 Tehran, Iran

<sup>d</sup>Department of Chemistry, University of Miami, Coral Gables, Florida 33146, United States

\*Corresponding author: Tel: +986633120611, fax: +986633120618.

Email address: [farhadi.s@lu.ac.ir](mailto:farhadi.s@lu.ac.ir) (S. Farhadi)

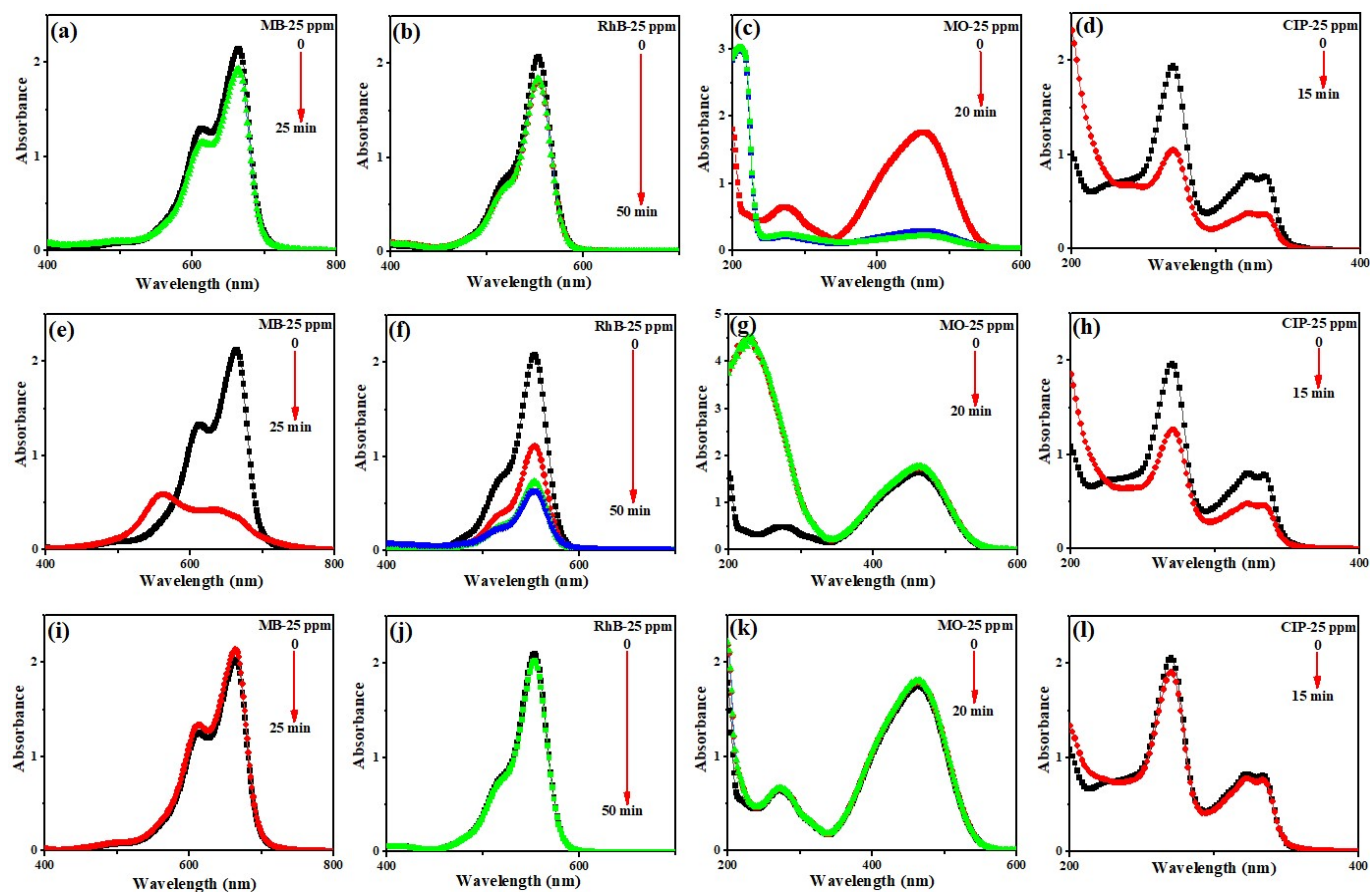

**Fig. 1S** The adsorption rate and capability of (a-d) pristine MIL-101(Cr), (e-h) pure  $\alpha\text{-SiW}_{11}\text{O}_{39}^{8-}$ , and (i-l) CFO nanoparticles

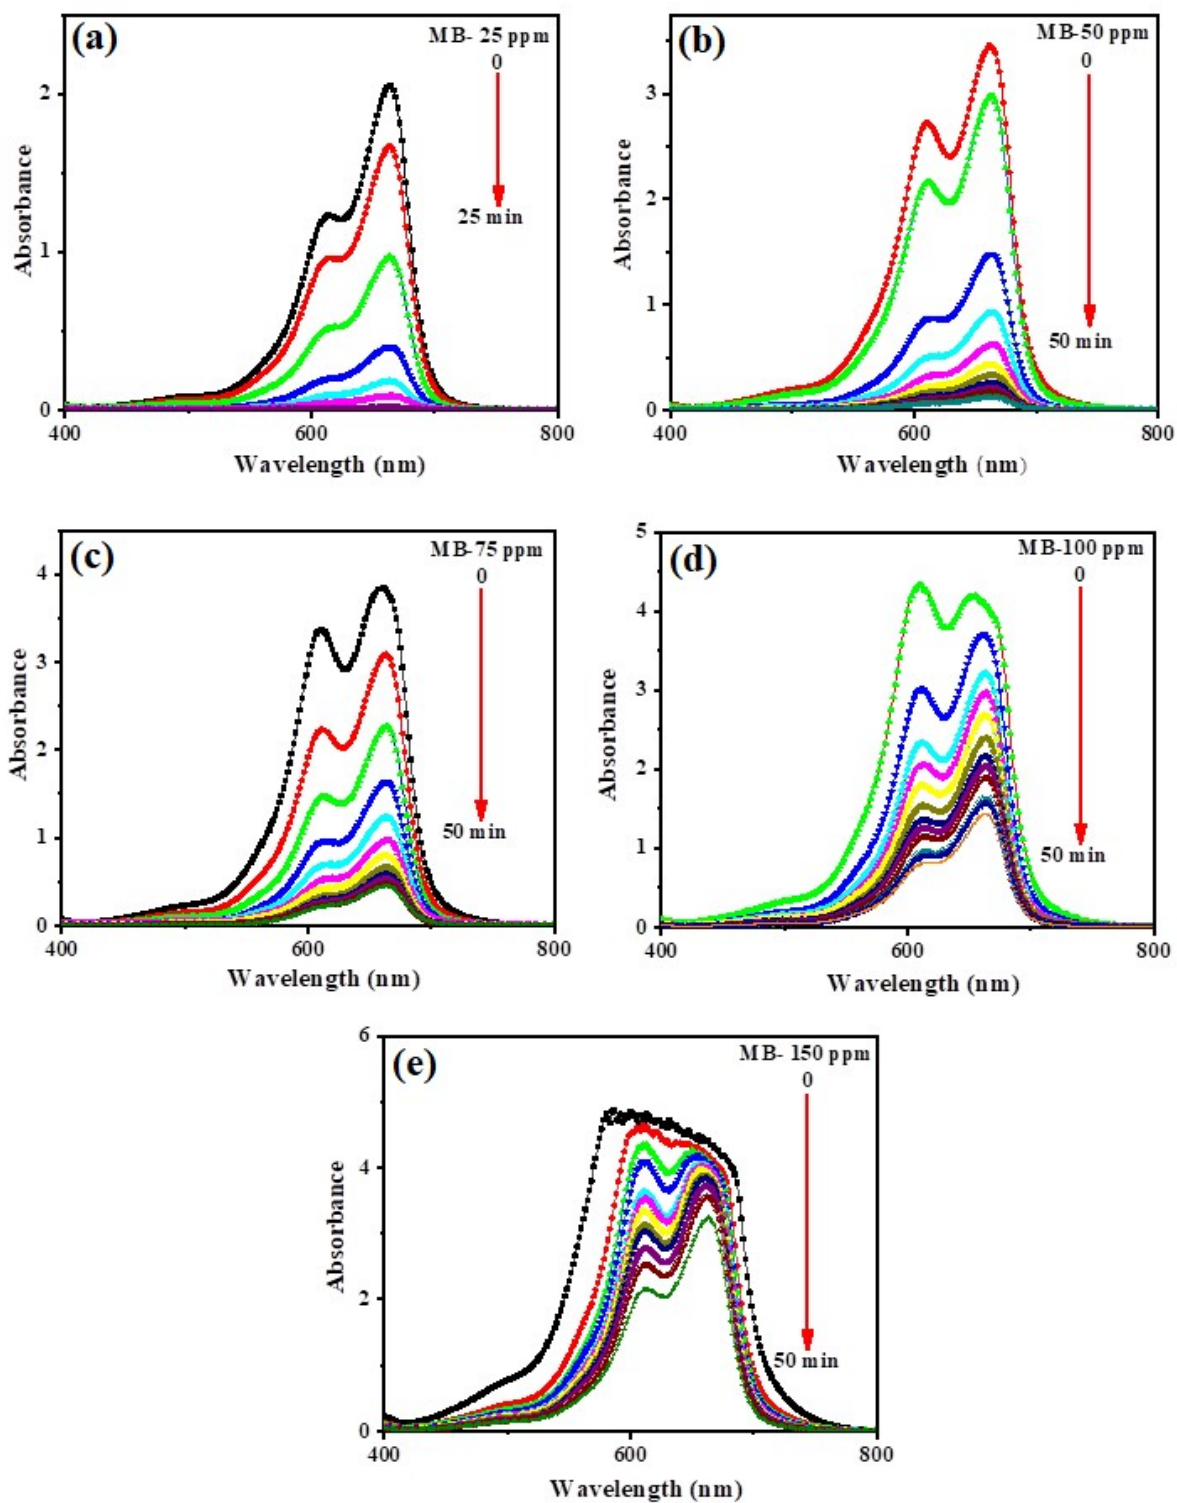

**Fig. 2S** The effect of different concentrations on the removal of MB by LPOM@MIL-101(Cr)/CFO nanocomposite. Reaction conditions:  $[dye]_0 = 25 \text{ mg l}^{-1}$ ; adsorbent dosage = 30 mg in 30 ml solution at ambient temperature

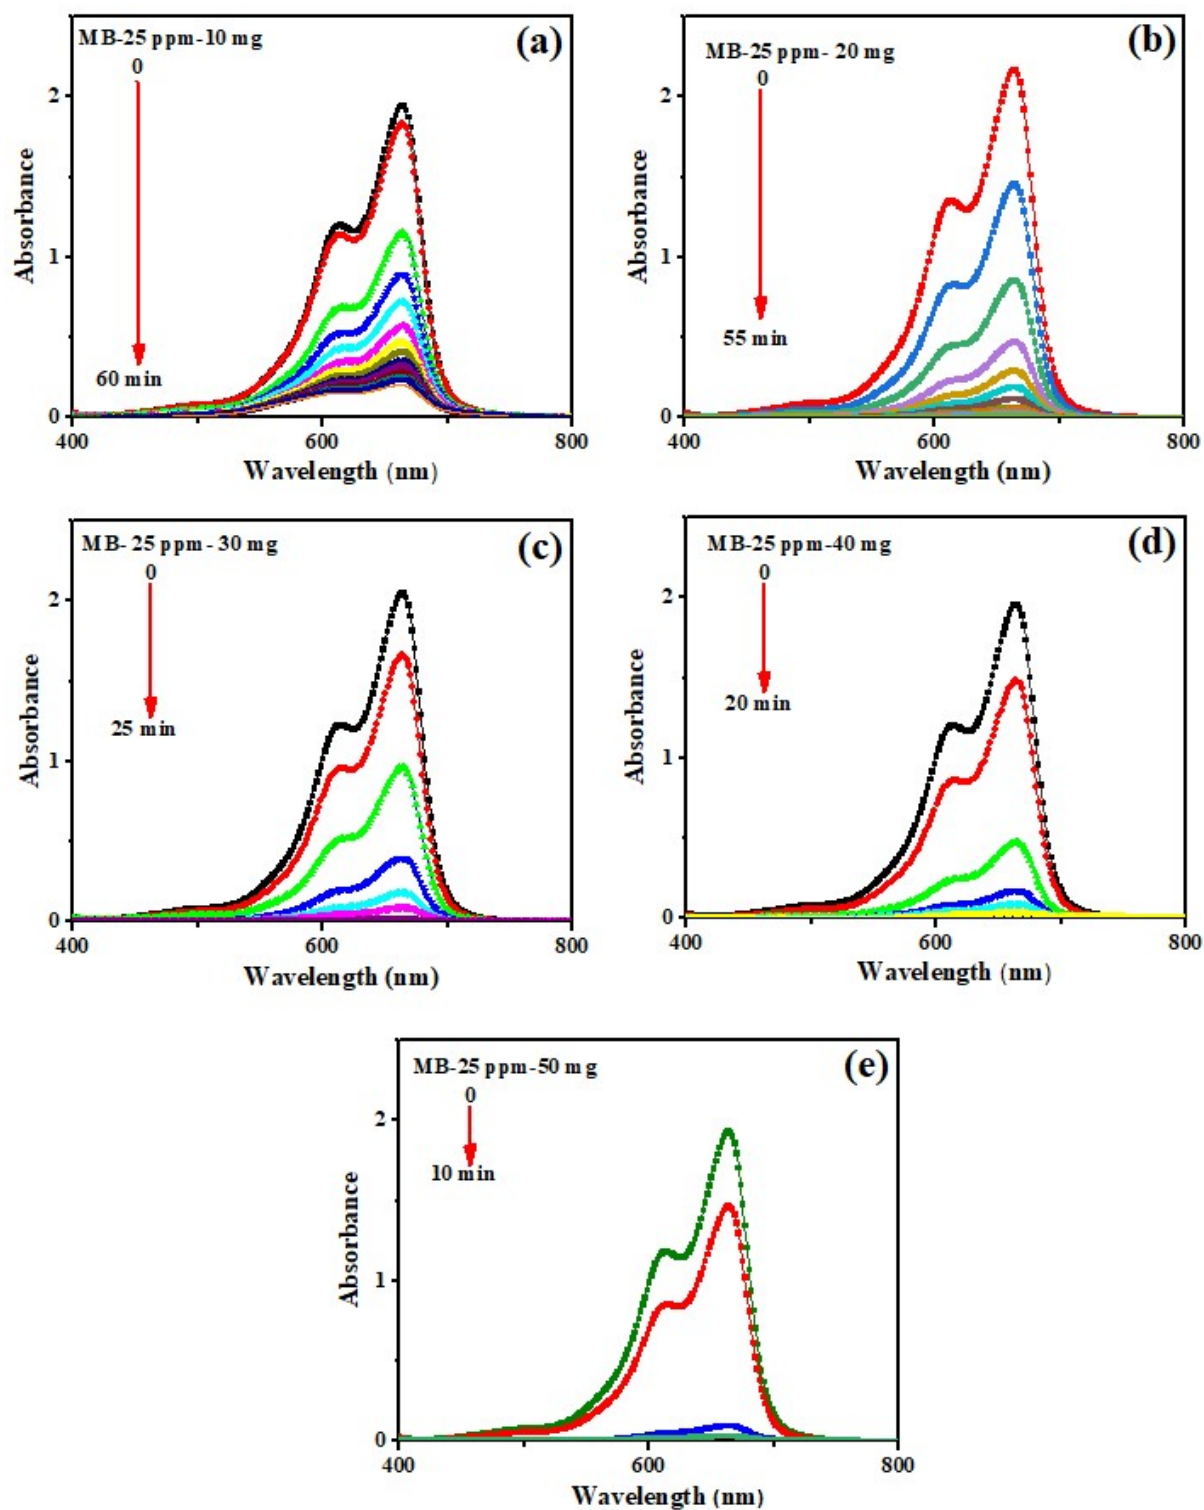

**Fig. 3S** The effects of adsorbent dosage on the removal of MB by LPOM@MIL-101(Cr)/CFO nanocomposite

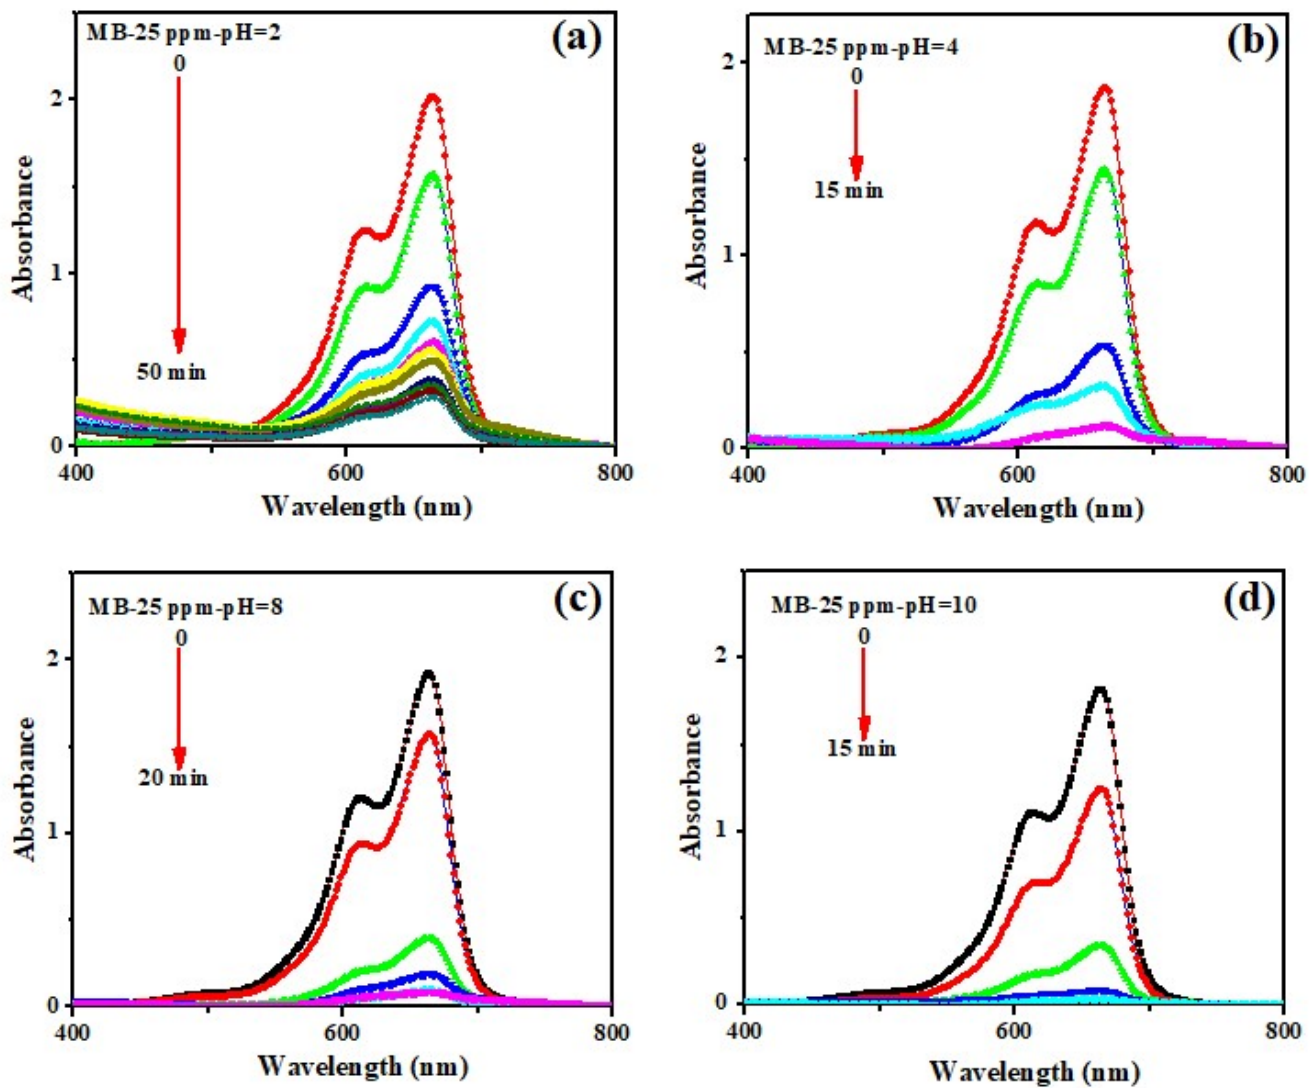

**Fig. 4S** The effects of different pH on the removal of MB by LPOM@MIL-101(Cr)/CFO nanocomposite

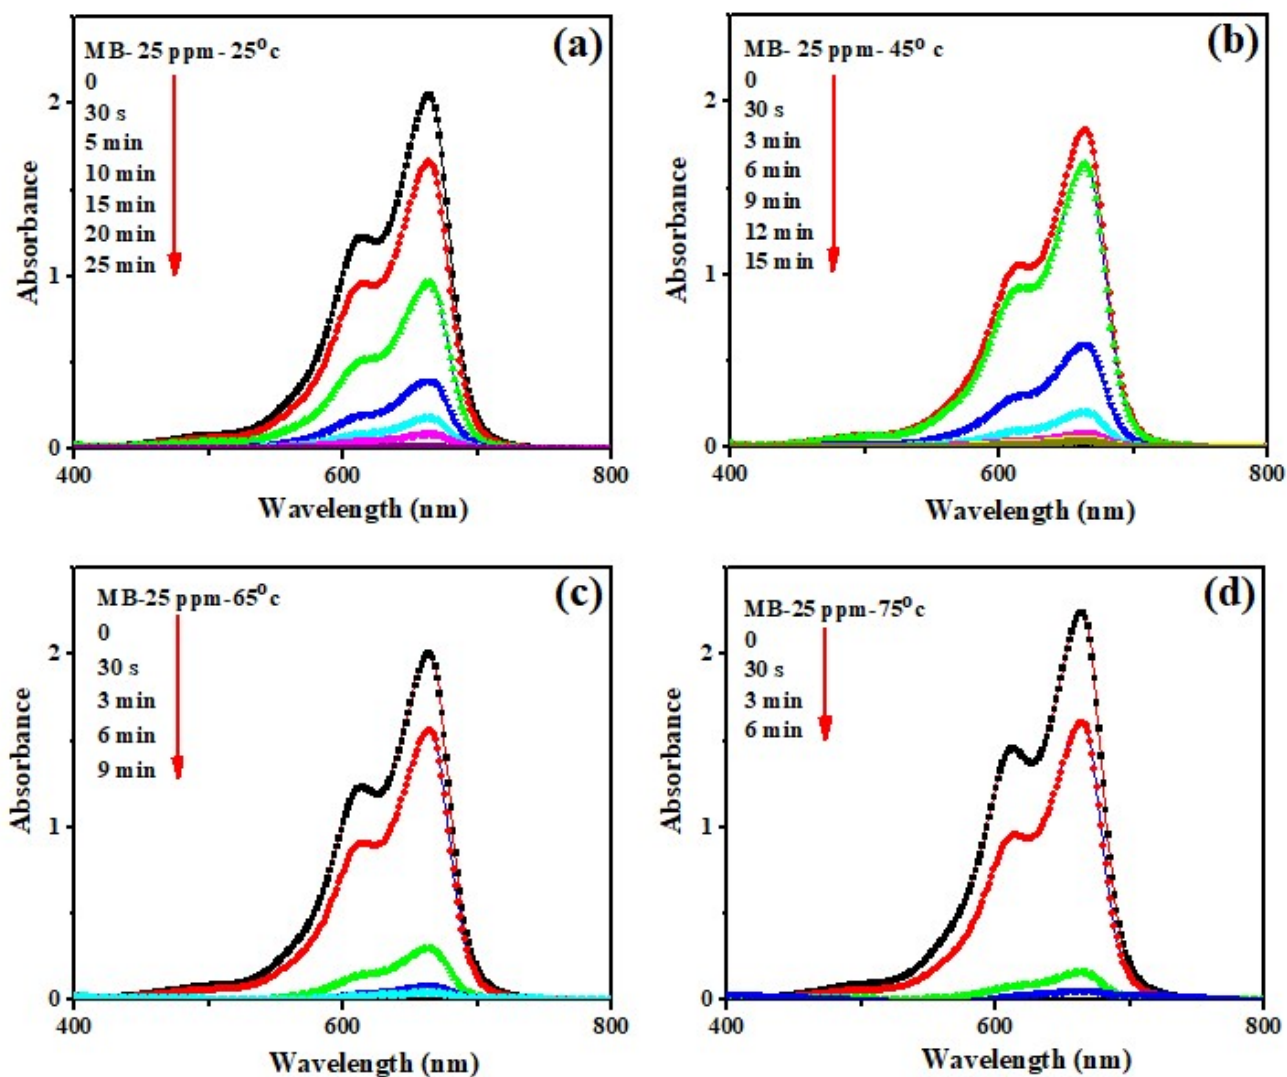

**Fig. 5S** The effects of different temperature on the removal of MB by LPOM@MIL-101(Cr)/CFO nanocomposite

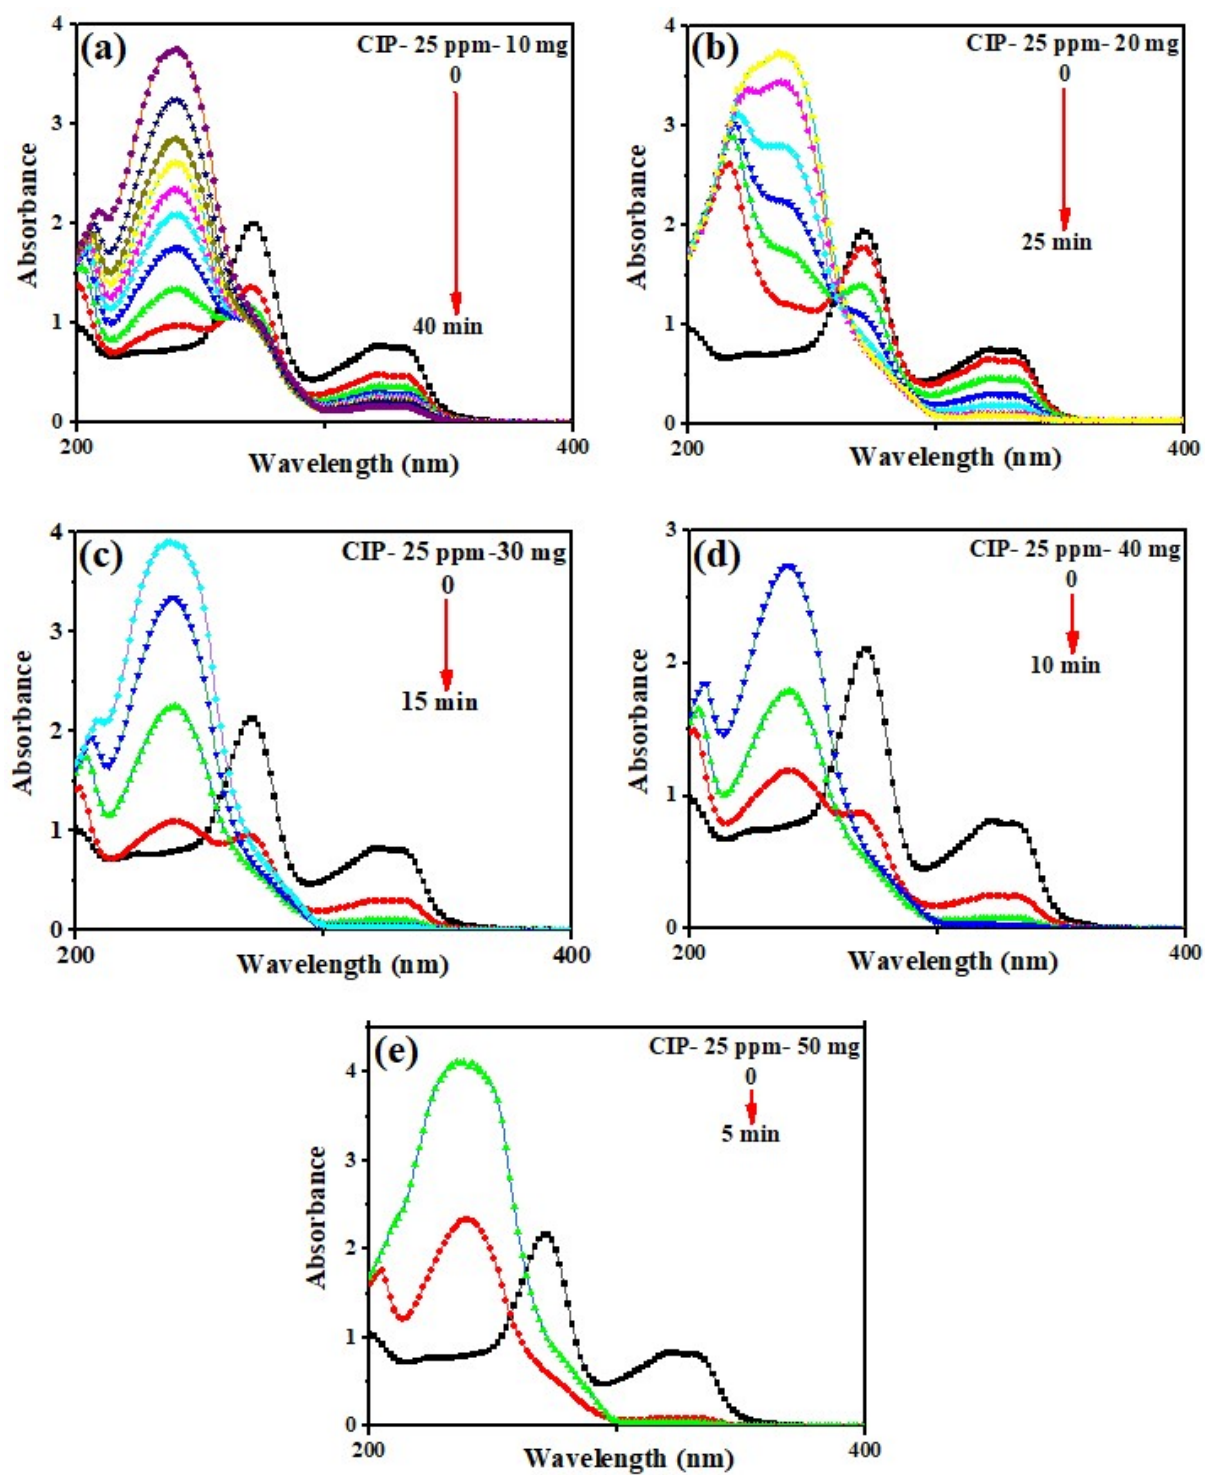

**Fig. 6S** The effect of adsorbent dosage on the removal of CIP drug by LPOM@MIL-101(Cr)/CFO nanocomposite

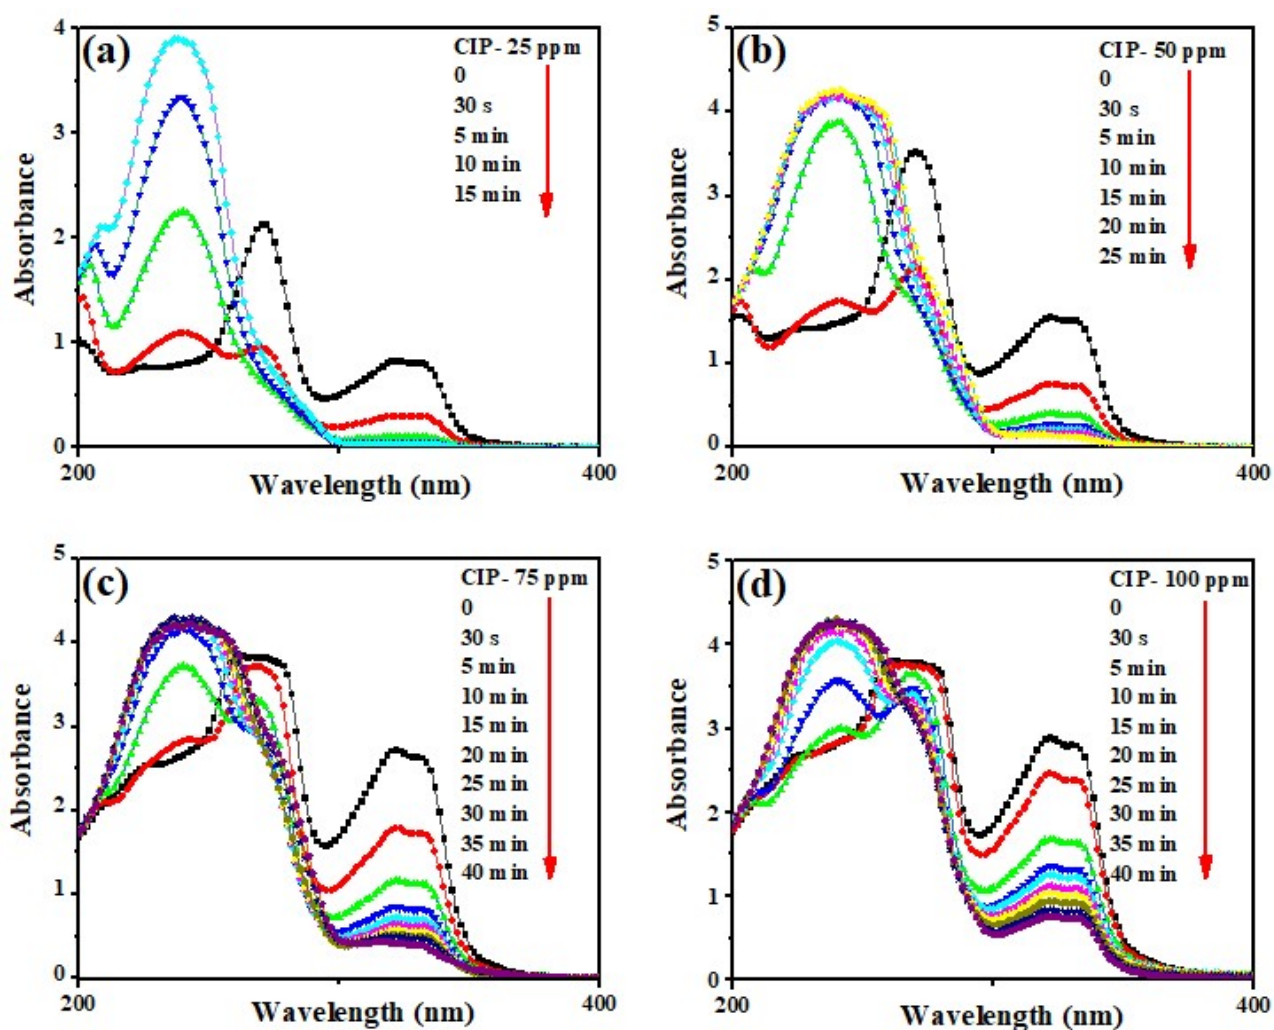

**Fig. 7S** The effect of different concentrations on the removal of CIP drug by LPOM@MIL-101(Cr)/CFO nanocomposite. Reaction conditions:  $[\text{drug}]_0 = 25 \text{ mg l}^{-1}$ ; adsorbent dosage = 30 mg in 30 ml solution at ambient temperature.



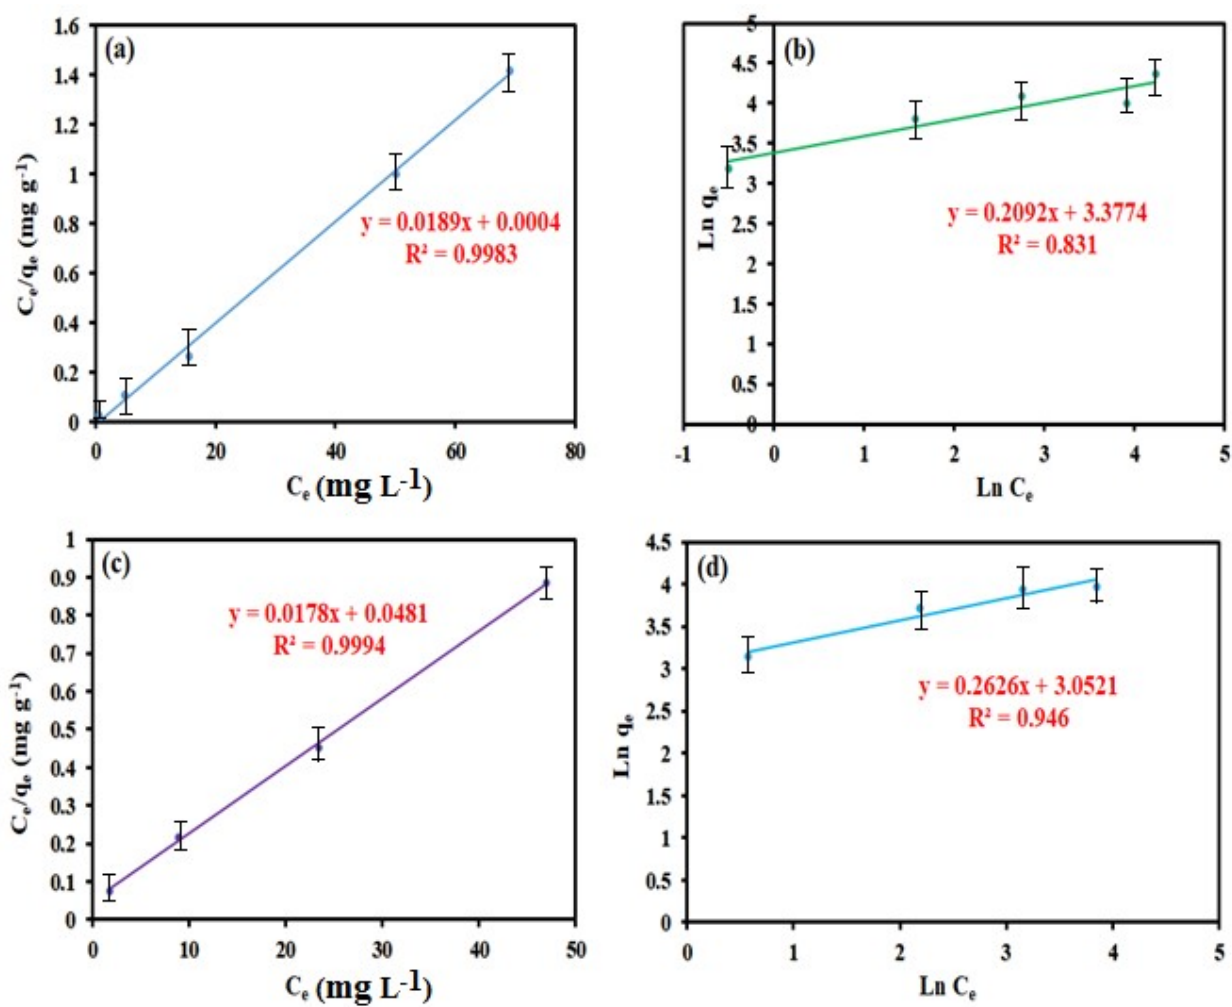

**Fig. 8S** (a,c) Langmuir isotherm and (b,d) Freundlich isotherm for adsorption of MB and CIP onto LPOM@MIL-101(Cr)/CFO nanocomposite. Error bars represent one standard deviation for three measurements.

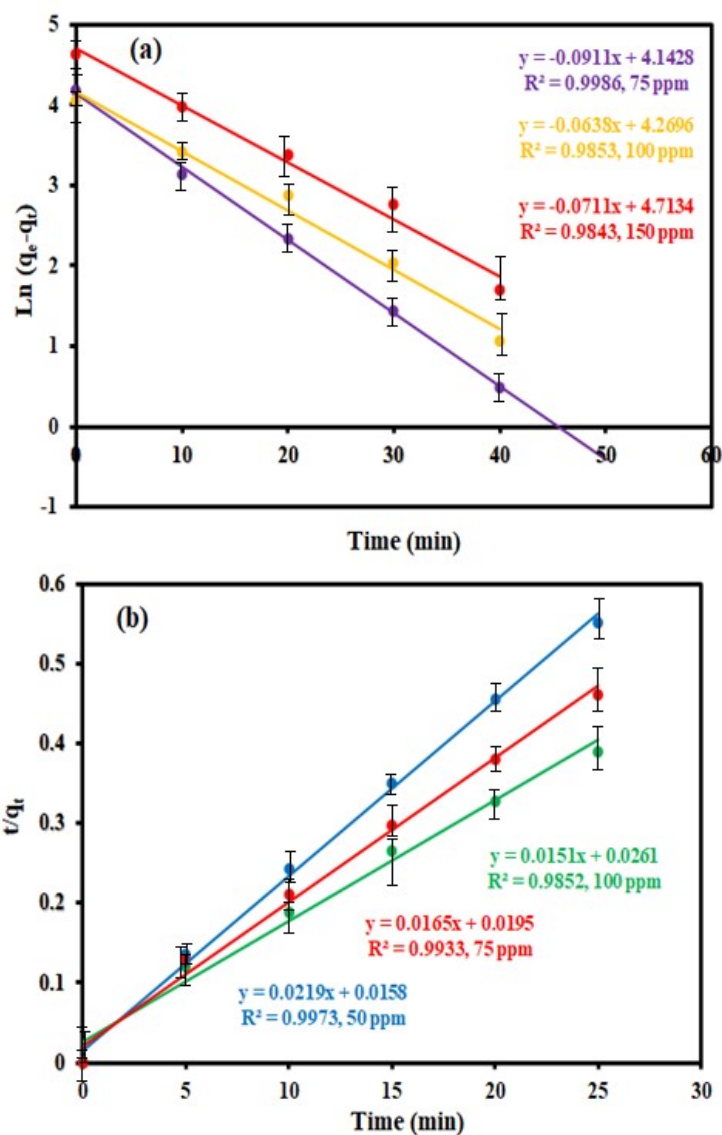

**Fig. 9S** (a) Pseudo- first- order kinetic for adsorption of MB, (b) pseudo- second- order kinetic for adsorption of CIP onto LPOM@MIL-101(Cr)/CFO nanocomposite. Error bars represent one standard deviation for three measurements.

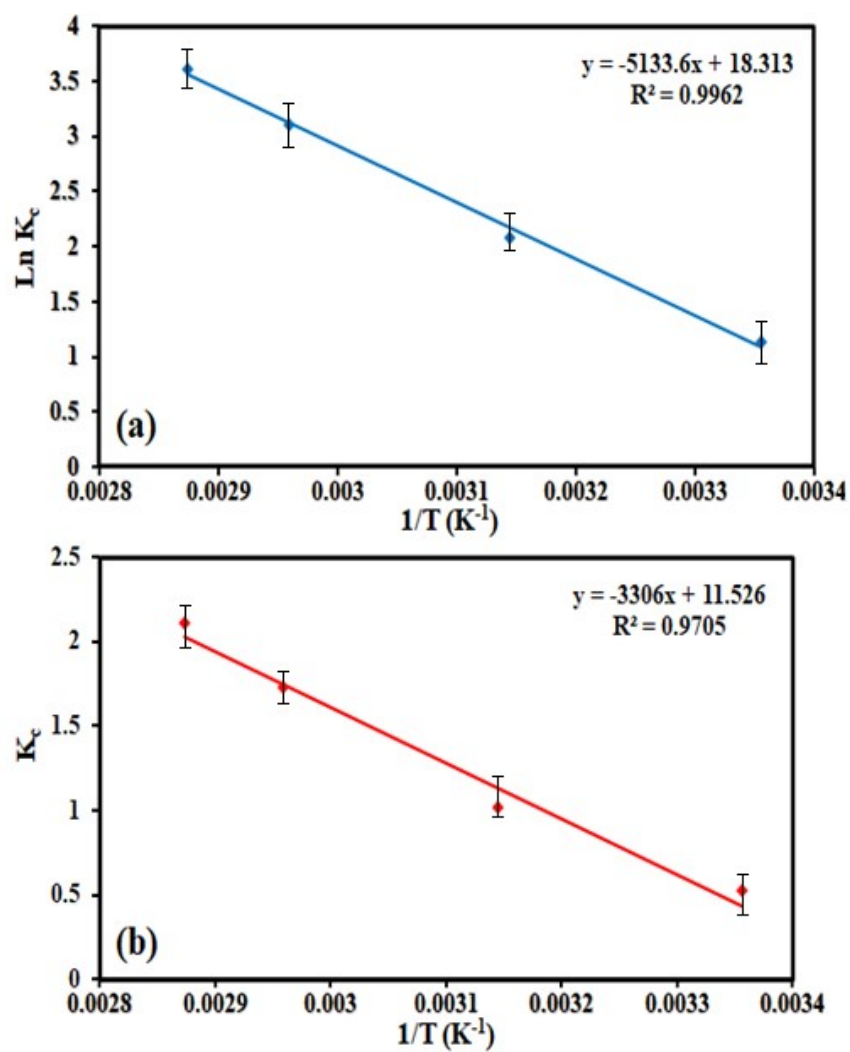

**Fig. 10S** Van't Hoff plots for the adsorption of (a) MB and (b) CIP on the LPOM@MIL-101(Cr)/CFO nanocomposite. Error bars represent one standard deviation for three measurements.
